# Supplementary material for: Inequalities in Temporal Effects on Cervical Cancer Mortality in States in Different Geographic Regions of Brazil: An Ecological Study
Source: MDPI journal article supplement (doi:10.3390/ijerph19095591), 2022-05-05
Supplement: s1 [file s1]

**Table S7.** Deviance and p-value analysis in sequential construction of age, period, and cohort models for the states in the North Region in Brazil.

| Models                 | Df <sup>a</sup> | Residual deviance | p (> Chi ) |
|------------------------|-----------------|-------------------|------------|
| Acre                   |                 |                   |            |
| Age                    | 99              | 175.22            |            |
| Age-drift <sup>b</sup> | 98              | 172.68            | 0.11       |
| Age-cohort             | 95              | 171.93            | 0.86       |
| Age-period-cohort      | 92              | 158.85            | 0.007      |
| Age-period             | 95              | 160.97            | 0.77       |
| Age-drift <sup>c</sup> | 98              | 172.68            | 0.008      |
| Amazonas               |                 |                   |            |
| Age                    | 99              | 299.94            |            |
| Age-drift <sup>b</sup> | 98              | 258.53            | <0.0001    |
| Age-cohort             | 95              | 233.02            | <0.0001    |
| Age-period-cohort      | 92              | 200.30            | <0.0001    |
| Age-period             | 95              | 228.09            | <0.0001    |
| Age-drift <sup>c</sup> | 98              | 258.53            | <0.0001    |
| Amapá                  |                 |                   |            |
| Age                    | 99              | 172.27            |            |
| Age-drift <sup>b</sup> | 98              | 146.30            | <0.0001    |
| Age-cohort             | 95              | 143.85            | <0.0001    |
| Age-period-cohort      | 92              | 138.02            | <0.0001    |
| Age-period             | 95              | 140.98            | <0.0001    |
| Age-drift <sup>c</sup> | 98              | 146.30            | <0.0001    |
| Pará                   |                 |                   |            |
| Age                    | 99              | 315.62            |            |
| Age-drift <sup>b</sup> | 98              | 312.17            | <0.0001    |
| Age-cohort             | 95              | 296.00            | <0.0001    |
| Age-period-cohort      | 92              | 268.60            | <0.0001    |
| Age-period             | 95              | 289.28            | <0.0001    |
| Age-drift <sup>c</sup> | 98              | 312.17            | <0.0001    |
| Rondônia               |                 |                   |            |
| Age                    | 99              | 226.845           |            |
| Age-drift <sup>b</sup> | 98              | 167.07            | <0.0001    |
| Age-cohort             | 95              | 156.78            | <0.0001    |
| Age-period-cohort      | 92              | 152.00            | <0.0001    |
| Age-period             | 95              | 161.79            | <0.0001    |
| Age-drift <sup>c</sup> | 98              | 167.07            | <0.0001    |
| Roraima                |                 |                   |            |
| Age                    | 99              | 159.83            |            |
| Age-drift <sup>b</sup> | 98              | 159.40            | 0.52       |
| Age-cohort             | 95              | 158.24            | 0.76       |
| Age-period-cohort      | 92              | 144.89            | 0.003      |
| Age-period             | 95              | 145.29            | 0.94       |

|                        |    |        |       |
|------------------------|----|--------|-------|
| Age-drift <sup>c</sup> | 98 | 159.40 | 0.004 |
| Tocantins              |    |        |       |
| Age                    | 60 | 103.83 |       |
| Age-drift <sup>b</sup> | 59 | 102.91 | 0.33  |
| Age-cohort             | 56 | 95.20  | 0.05  |
| Age-period-cohort      | 54 | 86.60  | 0.01  |
| Age-period             | 57 | 94.48  | 0.05  |
| Age-drift <sup>c</sup> | 59 | 102.91 | 0.01  |

<sup>a</sup>Degrees of freedom; <sup>b</sup>linear trend for the logarithm of age-specific rates, which is equal to the sum of the period and cohort slopes ( $\beta L + \gamma L$ ), where  $\beta L$  and  $\gamma L$  are the period and cohort linear trends, respectively; <sup>c</sup>longitudinal age trend, which is the sum of age and period slopes ( $\alpha L + \beta L$ ), where  $\alpha L$  and  $\beta L$  are the linear age and period trends, respectively.
