# Supplementary material for: Inequalities in Temporal Effects on Cervical Cancer Mortality in States in Different Geographic Regions of Brazil: An Ecological Study
Source: MDPI journal article supplement (doi:10.3390/ijerph19095591), 2022-05-05
Supplement: s1 [file s1]

Table S1. Sociodemographic characteristics of the states in the North, South, and Southeast Regions of Brazil.

| Location          | HDI (2010)  | Life expectancy at birth (2019) | Fertility rate (2019) | MHIPC (2020) <sup>1</sup> | % Black population <sup>2</sup> | % Indigenous population <sup>2</sup> |
|-------------------|-------------|---------------------------------|-----------------------|---------------------------|---------------------------------|--------------------------------------|
| <b>North</b>      |             |                                 |                       |                           |                                 |                                      |
| Acre              | 0.66        | 74.80                           | 2.39                  | 5,050.18                  | 72.08                           | 2.170                                |
| Amazonas          | 0.67        | 72.60                           | 2.20                  | 4,720.08                  | 73.93                           | 1.106                                |
| Amapá             | 0.71        | 74.70                           | 2.20                  | 4,947.22                  | 73.00                           | 4.84                                 |
| Pará              | 0.65        | 72.70                           | 2.05                  | 4,891.82                  | 76.75                           | 0.51                                 |
| Rondônia          | 0.69        | 71.60                           | 1.74                  | 6,476.26                  | 62.47                           | 0.76                                 |
| Roraima           | 0.71        | 72.40                           | 2.14                  | 5,445.82                  | 67.10                           | 11.01                                |
| Tocantins         | 0.70        | 74.20                           | 1.89                  | 5,872.40                  | 72.24                           | 0.94                                 |
| <b>South</b>      |             |                                 |                       |                           |                                 |                                      |
| Paraná            | 0.75        | 77.90                           | 1.61                  | 8,354.32                  | 28.25                           | 0.24                                 |
| Rio Grande do Sul | 0.75        | 78.50                           | 1.55                  | 9,744.86                  | 16.13                           | 0.30                                 |
| Santa Catarina    | 0.77        | 79.90                           | 1.54                  | 9,041.28                  | 15.35                           | 0.25                                 |
| <b>Southeast</b>  |             |                                 |                       |                           |                                 |                                      |
| Espírito Santo    | 0.74        | 79.10                           | 1.61                  | 7,462.38                  | 56.96                           | 0.26                                 |
| Minas Gerais      | 0.73        | 78.00                           | 1.58                  | 7,279.56                  | 53.49                           | 0.15                                 |
| Rio de Janeiro    | 0.76        | 77.00                           | 1.57                  | 9,545.56                  | 51.69                           | 0.09                                 |
| São Paulo         | 0.78        | 78.90                           | 1.58                  | 10,049.56                 | 34.62                           | 0.10                                 |
| <b>Brazil</b>     | <b>0.72</b> | <b>76.60</b>                    | <b>1.69</b>           | <b>7,645.20</b>           |                                 |                                      |

Source: Brazilian Institute of Geography and Statistics [32]. HDI: Human Development Index.

<sup>1</sup>Monthly household income per capita in US\$ (US\$ 1 is equivalent to approximately R\$ 5.50 – Jan/2022). <sup>2</sup>Resident population, by color or race, according to household status, sex and age, according to the 2010 Census
