# Supplementary material for: Inequalities in Temporal Effects on Cervical Cancer Mortality in States in Different Geographic Regions of Brazil: An Ecological Study
Source: MDPI journal article supplement (doi:10.3390/ijerph19095591), 2022-05-05
Supplement: s1 [file s1]

**Table S2.** Health indicators of states in the North, South, and Southeast regions of Brazil.

| Location          | No. of SUS cancer care services (2018) <sup>1</sup> | Child mortality rate (2019) <sup>2</sup> | IFDM (health) (2016) <sup>3</sup> |
|-------------------|-----------------------------------------------------|------------------------------------------|-----------------------------------|
| <b>North</b>      |                                                     |                                          |                                   |
| Acre              | 1.00                                                | 15.30                                    | 0.59                              |
| Amazonas          | 1.00                                                | 16.70                                    | 0.56                              |
| Amapá             | 1.00                                                | 22.60                                    | 0.63                              |
| Pará              | 4.00                                                | 15.20                                    | 0.59                              |
| Rondônia          | 3.00                                                | 18.80                                    | 0.76                              |
| Roraima           | 1.00                                                | 16.70                                    | 0.64                              |
| Tocantins         | 2.00                                                | 14.50                                    | 0.79                              |
| <b>South</b>      |                                                     |                                          |                                   |
| Paraná            | 24.00                                               | 8.20                                     | 0.86                              |
| Rio Grande do Sul | 29.00                                               | 8.80                                     | 0.88                              |
| Santa Catarina    | 17.00                                               | 8.40                                     | 0.86                              |
| <b>Southeast</b>  |                                                     |                                          |                                   |
| Espírito Santo    | 8.00                                                | 7.80                                     | 0.84                              |
| Minas Gerais      | 34.00                                               | 9.60                                     | 0.79                              |
| Rio de Janeiro    | 27.00                                               | 10.40                                    | 0.80                              |
| São Paulo         | 76.00                                               | 9.00                                     | 0.84                              |
| <b>Brazil</b>     | <b>307.00</b>                                       | <b>11.90</b>                             | <b>0.77</b>                       |

Sources: <sup>1</sup>Brazilian Institute of Geography and Statistics [32], <sup>2</sup>Brazilian Mortality Information System [34], <sup>3</sup>Industry Federation of the State of Rio de Janeiro [33]. SUS: Brazilian Unified Health System; IFDM: Firjan Index of Municipal Development.
