# Supplementary material for: Inequalities in Temporal Effects on Cervical Cancer Mortality in States in Different Geographic Regions of Brazil: An Ecological Study
Source: MDPI journal article supplement (doi:10.3390/ijerph19095591), 2022-05-05
Supplement: s1 [file s1]

**Table S6.** Deviance and p-value analysis in sequential construction of age, period, and cohort models for the states in the South and Southeast regions of Brazil.

| Models                 | Df <sup>a</sup> | Residual deviance | p (> Chi ) |
|------------------------|-----------------|-------------------|------------|
| Paraná                 |                 |                   |            |
| Age                    | 99              | 1321.65           |            |
| Age-drift <sup>b</sup> | 98              | 603.75            | <0.0001    |
| Age-cohort             | 95              | 498.79            | <0.0001    |
| Age-period-cohort      | 92              | 357.69            | <0.0001    |
| Age-period             | 95              | 465.03            | <0.0001    |
| Age-drift <sup>c</sup> | 98              | 603.75            | <0.0001    |
| Rio Grande do Sul      |                 |                   |            |
| Age                    | 99              | 1668.02           |            |
| Age-drift <sup>b</sup> | 98              | 581.78            | <0.0001    |
| Age-cohort             | 95              | 557.60            | <0.0001    |
| Age-period-cohort      | 92              | 402.35            | <0.0001    |
| Age-period             | 95              | 436.75            | <0.0001    |
| Age-drift <sup>c</sup> | 98              | 581.78            | <0.0001    |
| Santa Catarina         |                 |                   |            |
| Age                    | 99              | 449.29            |            |
| Age-drift <sup>b</sup> | 98              | 337.92            | <0.0001    |
| Age-cohort             | 95              | 288.56            | <0.0001    |
| Age-period-cohort      | 92              | 222.17            | <0.0001    |
| Age-period             | 95              | 272.83            | <0.0001    |
| Age-drift <sup>c</sup> | 98              | 337.92            | <0.0001    |
| Espírito Santo         |                 |                   |            |
| Age                    | 99              | 399.26            |            |
| Age-drift <sup>b</sup> | 98              | 257.97            | <0.0001    |
| Age-cohort             | 95              | 247.32            | <0.0001    |
| Age-period-cohort      | 92              | 185.04            | <0.0001    |
| Age-period             | 95              | 194.75            | <0.0001    |
| Age-drift <sup>c</sup> | 98              | 257.97            | <0.0001    |
| Minas Gerais           |                 |                   |            |
| Age                    | 99              | 1675.28           |            |
| Age-drift <sup>b</sup> | 98              | 630.99            | <0.0001    |
| Age-cohort             | 95              | 543.58            | <0.0001    |
| Age-period-cohort      | 92              | 493.70            | <0.0001    |
| Age-period             | 95              | 570.67            | <0.0001    |
| Age-drift <sup>c</sup> | 98              | 630.99            | <0.0001    |
| Rio de Janeiro         |                 |                   |            |
| Age                    | 99              | 1453.96           |            |
| Age-drift <sup>b</sup> | 98              | 900.29            | <0.0001    |
| Age-cohort             | 95              | 735.40            | <0.0001    |
| Age-period-cohort      | 92              | 498.60            | <0.0001    |
| Age-period             | 95              | 764.12            | <0.0001    |
| Age-drift <sup>c</sup> | 98              | 900.29            | <0.0001    |
| São Paulo              |                 |                   |            |

|                        |    |         |         |
|------------------------|----|---------|---------|
| Age                    | 99 | 6131.26 |         |
| Age-drift <sup>b</sup> | 98 | 2072.19 | <0.0001 |
| Age-cohort             | 95 | 1811.57 | <0.0001 |
| Age-period-cohort      | 92 | 1523.47 | <0.0001 |
| Age-period             | 95 | 1770.21 | <0.0001 |
| Age-drift <sup>c</sup> | 98 | 2072.19 | <0.0001 |

<sup>a</sup>Degrees of freedom; <sup>b</sup>linear trend for the logarithm of age-specific rates, which is equal to the sum of the period and cohort slopes ( $\beta L + \gamma L$ ), where  $\beta L$  and  $\gamma L$  are the period and cohort linear trends, respectively; <sup>c</sup>longitudinal age trend, which is the sum of age and period slopes ( $\alpha L + \beta L$ ), where  $\alpha L$  and  $\beta L$  are the age and period linear trends, respectively.
