# Supplementary material for: Inequalities in Temporal Effects on Cervical Cancer Mortality in States in Different Geographic Regions of Brazil: An Ecological Study
Source: MDPI journal article supplement (doi:10.3390/ijerph19095591), 2022-05-05
Supplement: s1 [file s1]

Table S5. Uncorrected mortality rates from cervical cancer, endometrial cancer, and uterine cancer of unspecified portion per 100,000 women in the states in the North, South, and Southeast regions in Brazil

| Locality          | South     |         |         |         |         |         |         |         |
|-------------------|-----------|---------|---------|---------|---------|---------|---------|---------|
|                   | Period    |         |         |         |         |         |         |         |
| Locality          | 1980-84   | 1985-89 | 1990-94 | 1995-94 | 2000-04 | 2005-09 | 2010-14 | 2015-19 |
| Paraná            |           |         |         |         |         |         |         |         |
| CC                | 8.83      | 9.35    | 10.38   | 11.53   | 10.30   | 8.31    | 7.35    | 7.96    |
| EC                | 0.80      | 1.18    | 1.60    | 1.52    | 1.97    | 2.20    | 1.92    | 2.16    |
| UCOUP             | 7.90      | 7.63    | 7.59    | 6.47    | 4.81    | 3.71    | 3.15    | 2.56    |
| Rio Grande do Sul |           |         |         |         |         |         |         |         |
| CC                | 8.51      | 9.63    | 10.31   | 10.63   | 9.56    | 7.77    | 6.67    | 7.73    |
| EC                | 1.34      | 1.61    | 1.80    | 2.19    | 2.15    | 1.95    | 1.95    | 1.94    |
| UCOUP             | 10.18     | 9.08    | 12.11   | 6.83    | 4.66    | 4.02    | 3.72    | 2.58    |
| Santa Catarina    |           |         |         |         |         |         |         |         |
| CC                | 5.98      | 6.85    | 8.22    | 9.20    | 7.63    | 7.04    | 6.85    | 7.45    |
| EC                | 0.43      | 0.57    | 1.32    | 1.73    | 1.37    | 1.69    | 1.91    | 1.81    |
| UCOUP             | 6.61      | 6.28    | 6.80    | 5.87    | 4.73    | 3.76    | 3.06    | 2.45    |
| Locality          | Southeast |         |         |         |         |         |         |         |
|                   | Period    |         |         |         |         |         |         |         |
| Locality          | 1980-84   | 1985-89 | 1990-94 | 1995-94 | 2000-04 | 2005-09 | 2010-14 | 2015-19 |
| Espírito Santo    |           |         |         |         |         |         |         |         |
| CC                | 7.96      | 9.08    | 9.41    | 9.52    | 8.57    | 9.07    | 7.93    | 8.65    |
| EC                | 1.33      | 0.82    | 0.69    | 0.91    | 0.81    | 1.21    | 1.32    | 1.96    |
| UCOUP             | 6.08      | 7.24    | 7.33    | 4.64    | 4.32    | 5.29    | 4.53    | 2.78    |
| Minas Gerais      |           |         |         |         |         |         |         |         |
| CC                | 6.82      | 6.90    | 6.69    | 6.46    | 6.16    | 5.92    | 9.38    | 5.23    |
| EC                | 0.58      | 0.68    | 0.82    | 0.80    | 0.99    | 1.05    | 2.70    | 1.81    |
| UCOUP             | 8.16      | 7.03    | 6.97    | 5.51    | 3.85    | 3.11    | 5.13    | 2.37    |
| Rio de Janeiro    |           |         |         |         |         |         |         |         |
| CC                | 8.68      | 7.94    | 8.82    | 9.11    | 9.72    | 8.46    | 8.05    | 7.82    |
| EC                | 2.17      | 2.02    | 2.00    | 2.04    | 2.19    | 2.38    | 2.57    | 2.98    |
| UCOUP             | 8.59      | 8.19    | 10.82   | 6.78    | 4.47    | 3.54    | 3.49    | 3.31    |
| São Paulo         |           |         |         |         |         |         |         |         |
| CC                | 9.06      | 8.10    | 8.53    | 8.20    | 7.55    | 5.84    | 5.06    | 4.89    |
| EC                | 1.81      | 1.72    | 2.27    | 2.38    | 2.31    | 2.31    | 2.24    | 2.59    |
| UCOUP             | 7.80      | 6.01    | 7.01    | 6.21    | 4.51    | 3.46    | 2.74    | 2.54    |
| Locality          | North     |         |         |         |         |         |         |         |
|                   | Period    |         |         |         |         |         |         |         |
| Locality          | 1980-84   | 1985-89 | 1990-94 | 1995-94 | 2000-04 | 2005-09 | 2010-14 | 2015-19 |
| Acre              |           |         |         |         |         |         |         |         |
| CC                | 11.03     | 10.06   | 15.56   | 12.43   | 9.52    | 8.36    | 16.71   | 18.71   |
| EC                | 1.23      | 0.00    | 0.00    | 0.99    | 0.64    | 0.87    | 1.60    | 1.91    |
| UCOUP             | 9.86      | 6.48    | 7.28    | 6.04    | 4.66    | 3.94    | 2.41    | 1.62    |

|           |       |       |       |       |       |       |       |       |
|-----------|-------|-------|-------|-------|-------|-------|-------|-------|
| Amazonas  |       |       |       |       |       |       |       |       |
| CC        | 13.60 | 17.95 | 13.05 | 19.60 | 19.17 | 25.61 | 31.43 | 28.88 |
| EC        | 0.34  | 0.83  | 0.59  | 0.88  | 0.90  | 1.21  | 1.55  | 2.34  |
| UCOUP     | 11.31 | 9.48  | 9.69  | 8.26  | 4.84  | 3.96  | 2.34  | 1.77  |
| Amapá     |       |       |       |       |       |       |       |       |
| CC        | 20.72 | 40.25 | 28.80 | 22.37 | 17.17 | 15.35 | 23.31 | 20.43 |
| EC        | 0.00  | 2.06  | 1.38  | 0.76  | 0.90  | 0.59  | 1.24  | 2.16  |
| UCOUP     | 19.39 | 3.31  | 9.48  | 10.19 | 6.95  | 8.81  | 2.38  | 3.71  |
| Pará      |       |       |       |       |       |       |       |       |
| CC        | 14.45 | 14.07 | 12.81 | 11.43 | 13.68 | 14.22 | 13.99 | 16.27 |
| EC        | 0.50  | 0.42  | 0.45  | 0.45  | 0.65  | 0.73  | 1.00  | 1.49  |
| UCOUP     | 5.80  | 6.90  | 6.69  | 6.42  | 2.79  | 3.75  | 4.20  | 3.11  |
| Rondônia  |       |       |       |       |       |       |       |       |
| CC        | 10.46 | 11.84 | 8.43  | 9.66  | 9.42  | 10.86 | 9.54  | 12.01 |
| EC        | 0.34  | 0.30  | 0.73  | 0.00  | 0.22  | 1.23  | 0.96  | 1.73  |
| UCOUP     | 10.10 | 14.51 | 10.91 | 7.61  | 8.22  | 3.74  | 2.72  | 2.19  |
| Roraima   |       |       |       |       |       |       |       |       |
| CC        | 17.64 | 8.51  | 17.64 | 10.14 | 11.85 | 24.60 | 11.96 | 19.92 |
| EC        | 3.47  | 0.00  | 0.00  | 0.77  | 2.15  | 1.92  | 1.13  | 1.96  |
| UCOUP     | 12.80 | 3.38  | 8.70  | 15.73 | 10.93 | 5.92  | 7.38  | 5.70  |
| Tocantins |       |       |       |       |       |       |       |       |
| CC        | —     | —     | —     | 7.64  | 11.95 | 14.99 | 14.81 | 15.00 |
| EC        | —     | —     | —     | 0.49  | 1.00  | 1.09  | 1.19  | 1.18  |
| UCOUP     | —     | —     | —     | 5.05  | 3.76  | 3.68  | 3.21  | 2.01  |

CC=cervical cancer, EC=endometrial cancer,UCOUP=uterine cancer of unspecified portion
