# Supplementary material for: Inequalities in Temporal Effects on Cervical Cancer Mortality in States in Different Geographic Regions of Brazil: An Ecological Study
Source: MDPI journal article supplement (doi:10.3390/ijerph19095591), 2022-05-05
Supplement: s1 [file s1]

**Table S3.** Uncorrected cervical cancer mortality rates per 100,000 women in the states in the North, South, and Southeast regions in Brazil

| Federation Units    | 1980-<br>1984 | 1985-<br>1989 | 1990-<br>1994 | 1995-<br>1999 | 2000-<br>2004 | 2005-<br>2009 | 2010-<br>2014 | 2015-<br>2019 | SMR   |
|---------------------|---------------|---------------|---------------|---------------|---------------|---------------|---------------|---------------|-------|
| South and Southeast | 1980-<br>1984 | 1985-<br>1989 | 1990-<br>1994 | 1995-<br>1999 | 2000-<br>2004 | 2005-<br>2009 | 2010-<br>2014 | 2015-<br>2019 | SMR   |
| Paraná              | 8.83          | 9.35          | 10.38         | 11.53         | 10.30         | 8.31          | 7.35          | 7.96          | 8.90  |
| Rio Grande do Sul   | 8.51          | 9.63          | 10.31         | 10.63         | 9.56          | 7.77          | 6.67          | 7.73          | 8.57  |
| Santa Catarina      | 5.98          | 6.85          | 8.22          | 9.20          | 7.63          | 7.04          | 6.85          | 7.45          | 7.37  |
| Espírito Santo      | 7.96          | 9.08          | 9.41          | 9.52          | 8.57          | 9.07          | 7.93          | 8.65          | 9.16  |
| Minas Gerais        | 6.82          | 6.90          | 6.69          | 6.46          | 6.16          | 5.92          | 9.38          | 5.23          | 5.93  |
| Rio de Janeiro      | 8.68          | 7.94          | 8.82          | 9.11          | 9.72          | 8.46          | 8.05          | 7.82          | 8.42  |
| São Paulo           | 9.06          | 8.10          | 8.53          | 8.20          | 7.55          | 5.84          | 5.06          | 4.89          | 6.57  |
| North               | 1980-<br>1984 | 1985-<br>1989 | 1990-<br>1994 | 1995-<br>1999 | 2000-<br>2004 | 2005-<br>2009 | 2010-<br>2014 | 2015-<br>2019 | SMR   |
| Acre                | 11.03         | 10.06         | 15.56         | 12.43         | 9.52          | 8.36          | 16.71         | 18.71         | 13.82 |
| Amazonas            | 13.60         | 17.95         | 13.05         | 19.60         | 19.17         | 25.61         | 31.43         | 28.88         | 24.13 |
| Amapá               | 20.72         | 40.25         | 28.80         | 22.37         | 17.17         | 15.35         | 23.31         | 20.43         | 21.55 |
| Pará                | 14.45         | 14.07         | 12.81         | 11.43         | 13.68         | 14.22         | 13.99         | 16.27         | 14.16 |
| Rondônia            | 10.46         | 11.84         | 8.43          | 9.66          | 9.42          | 10.86         | 9.54          | 12.01         | 10.44 |
| Roraima             | 17.64         | 8.51          | 17.64         | 10.14         | 11.85         | 24.60         | 11.96         | 19.92         | 16.38 |
| Tocantins           | —             | —             | —             | 7.64          | 11.95         | 14.99         | 14.81         | 15.00         | 13.53 |

SMR-standardized mean mortality rate
