# Supplementary material for: Inequalities in Temporal Effects on Cervical Cancer Mortality in States in Different Geographic Regions of Brazil: An Ecological Study
Source: MDPI journal article supplement (doi:10.3390/ijerph19095591), 2022-05-05
Supplement: s1 [file s1]

Table S4. Proportion of deaths from uterine cancer of unspecified portion in total uterine cancers, according to period and State

| Southeast |         |         |          |         |         |         |         |         |
|-----------|---------|---------|----------|---------|---------|---------|---------|---------|
| State     | 1980-84 | 1985-89 | 1990-194 | 1995-99 | 2000-04 | 2005-09 | 2010-14 | 2015-19 |
| ES        | 39.20   | 41.81   | 41.41    | 30.05   | 31.21   | 21.84   | 32.67   | 20.74   |
| MG        | 51.73   | 47.34   | 47.56    | 42.51   | 34.79   | 30.80   | 29.78   | 25.56   |
| RJ        | 43.93   | 44.85   | 50.00    | 39.20   | 27.33   | 24.88   | 25.34   | 24.52   |
| SP        | 41.05   | 38.52   | 38.74    | 36.42   | 31.10   | 29.73   | 27.52   | 25.79   |
| South     |         |         |          |         |         |         |         |         |
| State     | 1980-84 | 1985-89 | 1990-194 | 1995-99 | 2000-04 | 2005-09 | 2010-14 | 2015-19 |
| PR        | 43.30   | 40.62   | 37.31    | 32.17   | 27.33   | 25.70   | 25.37   | 20.49   |
| RS        | 50.10   | 44.02   | 50.00    | 34.41   | 28.51   | 29.60   | 30.80   | 21.97   |
| SC        | 48.94   | 43.30   | 40.60    | 33.79   | 32.91   | 29.62   | 25.74   | 21.31   |
| North     |         |         |          |         |         |         |         |         |
| AC        | 43.30   | 40.62   | 37.31    | 32.17   | 27.33   | 25.70   | 25.37   | 20.49   |
| AM        | 42.91   | 32.64   | 39.95    | 27.59   | 18.52   | 12.10   | 6.24    | 5.11    |
| AP        | 43.10   | 7.69    | 23.81    | 31.00   | 28.00   | 36.36   | 9.73    | 14.22   |
| PA        | 25.80   | 31.15   | 33.09    | 33.67   | 15.62   | 19.42   | 21.48   | 14.65   |
| RO        | 47.30   | 50.72   | 55.24    | 42.26   | 46.72   | 24.79   | 18.68   | 13.14   |
| RR        | 31.82   | 33.33   | 32.26    | 56.52   | 43.55   | 17.59   | 35.23   | 18.92   |
| TO        | —       | —       | —        | 36.51   | 22.11   | 18.61   | 16.33   | 36.51   |
